# Supplementary material for: CRISPR/Cas9-mediated VDR knockout plays an essential role in the growth of dermal papilla cells through enhanced relative genes
Source: PeerJ. 2019 Jul 3;7:e7230. doi: 10.7717/peerj.7230 (PMC6612256; doi:10.7717/peerj.7230)
Supplement: Data S1 — Each data indicates the relative genes expression of VDR−∕− and negative control (wild type). [file peerj-07-7230-s004.xlsx]

## Sheet: VDR
			nc-1	A01	33.53		A10	21.93	11.5		-0.198	0.871758
				A02	33.31		A11	22.02	11.28		0.022	1.01537
				A03	33.56		A12	22.14	11.53		-0.228	0.853818
								22.03			11.302
			nc-2	B01	33.17		B10	21.86	11.16		0.142	1.10343
				B02	33.31		B11	21.96	11.3		0.002	1.00139
				B03			B12	22.21			11.302
								22.01			11.302
			nc-3	C01	32.32		C10	21.51	10.805		0.497	1.41128
				C02	32.65		C11	21.52	11.135		0.167	1.12272
				C03	33.22		C12		11.705		-0.403
								21.515	11.3019		0.000125
			sgRNA	F01	30.81		F10	17.28	13.56		-2.258	0.209062
				F02	30.54		F11	17.17	13.29		-1.988	0.252088
				F03			F12	17.3			11.302	0.230575
								17.25			11.302
