# Supplementary material for: CRISPR/Cas9-mediated VDR knockout plays an essential role in the growth of dermal papilla cells through enhanced relative genes
Source: PeerJ. 2019 Jul 3;7:e7230. doi: 10.7717/peerj.7230 (PMC6612256; doi:10.7717/peerj.7230)
Supplement: Data S2 — Each data indicates the expression of VDR in different tissues at different period. [file peerj-07-7230-s005.xlsx]

## Sheet: Sheet1
													E120		E60
E60-liver	A01			E01	21.28								brain	1.4077	brain	0.804782			E120 Descriptives
	A02	29.3		E02	21.28	8.08		5.31667						1.49831		0.793702			VAR00005
	A03	29.29		E03	21.1	8.07		5.32667						1.25701		1.22547				N	Mean	Std. Deviation	Std. Error	95% Confidence Interval for Mean		Minimum	Maximum
					21.22	8.075		5.32167						1.46409		1.27751								Lower Bound	Upper Bound
	A04	31.44		E04		8.16		5.23667					spleen	12.2962	spleen	24.9333		brain	1	4	1.40678	0.106604	0.0533021	1.23715	1.57641	1.25701	1.49831
	A05	31.19		E05	23.29	7.91		5.48667						11.8773		23.4254		spleen	2	4	10.7261	2.58934	1.29467	6.60584	14.8463	6.85335	12.2962
	A06			E06	23.27			13.3967						11.8773		24.4201		muscle	3	4	2.63368	0.948353	0.474176	1.12464	4.14272	1.23412	3.24183
					23.28			13.3967						6.85335		24.761		kidney	4	4	43.326	11.5857	5.79286	24.8905	61.7615	26.388	50.9783
	A07			E07	19.36			13.3967					muscle	3.1972	muscle	1.13813		liver	5	4	40.6324	3.00666	1.50333	35.8481	45.4166	37.7046	44.8386
	A08	29.71		E08		10.37		3.02667	8.14927					3.24183		1.34413		forestomach	6	4	3.9942	1.16624	0.583118	2.13846	5.84994	2.31606	5.01646
	A09	28.98		E09	19.32	9.64		3.75667	13.5167					2.86158		0.905427		small intestine	7	4	47.5858	1.8356	0.917798	44.6649	50.5066	46.2593	50.2715
					19.34			13.3967	10.833					1.23412		1.12923		heart	8	4	0.0175868	0.00338161	0.0016908	0.0122059	0.0229677	0.0127649	0.0204795
E60-forestomach	B01	29.52		F01	18.2	11.27		2.12667	4.36708				kidney	45.3116	kidney	15.3838		skin	9	4	112.784	6.10938	3.05469	103.063	122.505	105.908	120.259
	B02	29.32		F02	18.28	11.07		2.32667	5.01646					50.9783		16.8344			Total	36	29.234	35.6262	5.9377	17.1799	41.2882	0.0127649	120.259
	B03	29.55		F03	18.27	11.3		2.09667	4.27721					50.6261		13.5793
					18.25			13.3967						26.388		15.2658
	B04	29.38		F04	17.04	12.355		1.04167	2.05861				liver	39.8545	liver	2.21402			brain	1.40678	0.0533021
	B05	29.21		F05	17.01	12.185		1.21167	2.31606					40.1317		2.1386			spleen	10.7261	1.29467
	B06	29.27		F06	17.025			13.3967						37.7046		2.68826			muscle	2.63368	0.474176
								13.3967						44.8386		2.34696			kidney	43.326	5.79286
	B07			F07	22.24			13.3967					forestomach	4.36708	forestomach	9.73607			liver	40.6324	1.50333
	B08	31.79		F08	22.26	9.54		3.85667	14.4868					5.01646		9.73607			forestomach	3.9942	0.583118
	B09	31.64		F09	22.25	9.39		4.00667	16.0741					4.27721		10.1167			small intestine	47.5858	0.917798
								13.3967	6.94234					2.31606		7.78124			heart	0.0175868	0.0016908
E60-skin	C01	28.15		G01	21.58	6.55667		6.84	114.563				small intestine	46.2593	small intestine	9.44774			skin	112.784	3.05469
	C02	28.02		G02	21.62	6.42667		6.97	125.366					46.581		9.44774
	C03	28.08		G03	21.58	6.48667		6.91	120.259					47.2313		9.89104
					21.5933			13.3967						50.2715		13.4543		E60Descriptives
	C04	24.85		G04		6.78		6.61667	98.1332				heart	0.0179088	heart	18.3368		VAR00006
	C05	24.74		G05	18.06	6.67		6.72667	105.908					0.0191941		16.4119			N	Mean	Std. Deviation	Std. Error	95% Confidence Interval for Mean		Minimum	Maximum
	C06	24.68		G06	18.08	6.61		6.78667	110.406					0.0204795		17.7122							Lower Bound	Upper Bound
					18.07			13.3967						0.0127649		17.487		1	4	1.02537	0.26201	0.131005	0.608452	1.44228	0.793702	1.27751
	C07	27.27		G07	18.58	8.685		4.71167			lung	6.72782	skin	114.563	skin	13.9611		2	4	24.385	0.674321	0.33716	23.312	25.458	23.4254	24.9333
	C08			G08	18.59			13.3967				5.93867		120.259		10.878		3	4	1.12923	0.179209	0.0896047	0.844067	1.41439	0.905427	1.34413
	C09	27.21		G09	18.585	8.625		4.77167				3.54752		105.908		12.2384		4	4	15.2658	1.33149	0.665746	13.1471	17.3845	13.5793	16.8344
								13.3967	112.439			3.59704		110.406		12.3592		5	4	2.34696	0.243288	0.121644	1.95984	2.73409	2.1386	2.68826
E60-brain	D01	33.47		H01	20.6	12.9033		0.49334	1.4077									6	4	9.34252	1.05621	0.528105	7.66186	11.0232	7.78124	10.1167
	D02	33.38		H02	20.52	12.8133		0.58334	1.49831									7	4	10.5602	1.9407	0.97035	7.47213	13.6483	9.44774	13.4543
	D03			H03	20.58			13.3967										8	4	17.487	0.801814	0.400907	16.2111	18.7628	16.4119	18.3368
					20.5667			13.3967										9	4	12.3592	1.26157	0.630783	10.3517	14.3666	10.878	13.9611
	D04	30.73		H04	17.67	13.0667		0.33	1.25701									Total	36	10.4335	7.71094	1.28516	7.82446	13.0425	0.793702	24.9333
	D05	30.51		H05	17.7	12.8467		0.55	1.46409
	D06	30.76		H06	17.62	13.0967		0.3	1.23114
					17.6633			13.3967										brain	1.02537	0.131005
	D07	33.12		H07	19.2	13.9033		-0.50666	0.70385									spleen	24.385	0.33716
	D08	32.24		H08	19.2	13.0233		0.37334	1.29535									muscle	1.12923	0.0896047
	D09			H09	19.25			13.3967	1.26535									kidney	15.2658	0.665746
					19.2167			13.3967										liver	2.34696	0.121644
E60-small intestine	A10	24.38		D10	16.55	7.865		5.53167	46.2593									forestomach	9.34252	0.528105
	B10	24.37		F10	16.48	7.855		5.54167	46.581									small intestine	10.5602	0.97035
	C10	24.35			16.515	7.835		5.56167	47.2313									heart	17.487	0.400907
								13.3967										skin	12.3592	0.630783
	G10	31.62				7.745		5.65167	50.2715
	H10	31.51				7.635		5.76167	54.2545
	E12	31.62				7.745		5.65167	50.2715
								13.3967	49.1448
								13.3967
E60-spllen	A01	26.49		E01	16.82	9.76667		3.63	12.2962
	A02	26.54		E02	16.64	9.81667		3.58	11.8773
	A03	26.54		E03	16.71	9.81667		3.58	11.8773
					16.7233			13.3967
	A04			E04				13.3967
	A05	29.69		E05	18.85	10.85		2.54667	5.80304
	A06	29.45		E06	18.83	10.61		2.78667	6.85335
					18.84			13.3967
	A07	26.73		E07	17.26	9.45		3.94667	15.3143
	A08	26.64		E08	17.29	9.36		4.03667	16.3001
	A09	26.71		E09	17.29	9.43		3.96667	15.5281
					17.28			13.3967	11.9812
E60-muscle	B01	27.51		F01	15.79	11.71		1.68667	3.1972
	B02	27.49		F02		11.69		1.70667	3.24183
	B03	27.67		F03	15.81	11.87		1.52667	2.86158
					15.8			13.3967
	B04	28.76		F04	15.7	13.0833		0.31334	1.23412
	B05	28.42		F05	15.66	12.7433		0.65334	1.56209
	B06	28.55		F06	15.67	12.8733		0.52334	1.42749
					15.6767			13.3967
	B07	37		F07		8.65		4.74667	26.6638
	B08	35.7		F08	28.34	7.35		6.04667	65.654
				F09	28.36			13.3967	13.2303
					28.35			13.3967
E60-spleen	C01	29.16		G01		7.885		5.51167	45.3116
	C02			G02	21.27			13.3967
	C03	29		G03	21.28	7.725		5.67167	50.6261
					21.275			13.3967
	C04			G04				13.3967
	C05	26.72		G05	18.07	8.665		4.73167	26.388
	C06	26.84		G06	18.04	8.785		4.61167	24.2819
					18.055			13.3967
	C07	27.77		G07		7.715		5.68167	50.9783
	C08	27.72		G08	20.03	7.665		5.73167	52.776
	C09			G09	20.08			13.3967	41.727
					20.055			13.3967
E60-heart	A10			A11	31.38			13.3967
	B10	34.19		B11		19.19		-5.79333	0.0179088
	C10	34.09		C11	31.38	19.09		-5.69333	0.0191941
					31.38			13.3967
	D10			D11	27.97			13.3967
	E10	31.7		E11		3.79		9.60667	774.333
	F10	31.5		F11	27.85	3.59		9.80667	889.475
					27.91			13.3967
E120-G2	G10	32.06		G11	24.06	8.02		5.37667	41.2639
	H10			H11	24.02			13.3967
						8.02
					24.04
E120-spllen				E01	16.72
				E02	16.53
				E03	16.47
	A04	33.17		E04	19.48		13.71		-0.31333	0.804782
	A05			E05	19.47				13.3967
	A06	33.19		E06	19.43		13.73		-0.33333	0.793702
									13.3967
	A07	33.43		E07	20.35		13.1033		0.29334	1.22547
	A08	33.37		E08	20.27		13.0433		0.35334	1.27751
	A09			E09	20.36		13.3967		5e-06
					20.3267				13.3967
E120-spllen	B01	29.6		F01	20.89		8.75667		4.64	24.9333
	B02	29.69		F02	20.76		8.84667		4.55	23.4254
	B03	29.63		F03	20.88		8.78667		4.61	24.4201
					20.8433				13.3967
	B04	27.18		F04	18.51		8.76667		4.63	24.761
	B05	27.07		F05	18.33		8.65667		4.74	26.7228
	B06	27.11		F06	18.4		8.69667		4.7	25.9921
					18.4133				13.3967
									13.3967
E120-muscle				G01	19.47		-19.4		32.7967
				G02	19.33				13.3967
				G03	19.4		-19.4		32.7967
					19.4				13.3967
	C07	33.7		G04	20.49		13.21		0.18667	1.13813
	C08	33.46		G05	20.41		12.97		0.42667	1.34413
	C09	34.03		G06	20.57		13.54		-0.14333	0.905427
					20.49				13.3967
									13.3967
									13.3967
									13.3967
									13.3967
E120-kidney	D01	26.96		H01	17.55		9.45333		3.94334	15.3838
	D02	26.83		H02	17.46		9.32333		4.07334	16.8344
	D03	27.14		H03	17.51		9.63333		3.76334	13.5793
					17.5067				13.3967
									13.3967
									13.3967
									13.3967
									13.3967
	D07	25.96		H07	17.83		8.1		5.29667	39.3058
	D08	25.9		H08	17.84		8.04		5.35667	40.9749
	D09	25.92		H09	17.91		8.06		5.33667	40.4108
					17.86				13.3967
E120-liver	D10	34.59		H10			12.25		1.14667	2.21402
	D11	34.64		H11	22.36		12.3		1.09667	2.1386
	D12	34.31		H12	22.32		11.97		1.42667	2.68826
					22.34		12.1733		1.22334
									13.3967
									13.3967
									13.3967
									13.3967
									13.3967
	A04	18.1		E04	30.04		11.9367		1.46	2.75108
	A05	18.11		E05	29.79		11.6867		1.71	3.27161
	A06	18.1		E06	29.56		11.4567		1.94	3.83706
		18.1033					11.6933		1.70333	3.28658
	A07	23.37		E07	32.72		9.44333		3.95334	15.4908
	A08	23.16		E08	32.87		9.59333		3.80334	13.9611
	A09	23.3		E09	33.02		9.74333		3.65334	12.5824
		23.2767							13.3967	14.0114
E120-forestomach	B01	22.25							13.3967
	B02	22.17							13.3967
	B03	22.2							13.3967
		22.2067							13.3967
	B04	17.11		F04	26.98		9.95333		3.44334	10.878
	B05	17		F05	27.14		10.1133		3.28334	9.73607
	B06	16.97		F06	27.14		10.1133		3.28334	9.73607
		17.0267							13.3967	10.1167
	B07	18.63		F07	29.07		10.4367		2.96	7.78124
	B08	18.68		F08	29.01		10.3767		3.02	8.11168
	B09	18.59		F09	28.97		10.3367		3.06	8.33973
		18.6333							13.3967	8.07755
E120-small intestine	C01	20.75		G01	30.5		9.9667		3.42997	10.7776
	C02	20.27		G02	30.69		10.1567		3.23997	9.44774
	C03	20.58		G03	30.69		10.1567		3.23997	9.44774
		20.5333							13.3967	9.89104
	C04	16.51		G04	26.12		9.64667		3.75	13.4543
	C05	16.49		G05	26.01		9.53667		3.86	14.5203
	C06	16.42		G06	26.06		9.58667		3.81	14.0257
		16.4733							13.3967	14.0001
	C07	16.65		G07	26.96		10.37		3.02667	8.14927
	C08	16.58		G08	27.52		10.93		2.46667	5.52766
	C09	16.54		G09	27.03		10.44		2.95667	7.7633
		16.59							13.3967	7.14674
E120-heart	D01	22.42		H01	29.94		7.67667		5.72
	D02	22.12		H02	29.52		7.25667		6.14
	D03	22.25		H03	30.15		7.88667		5.51
		22.2633							13.3967
	D04	18.75		H04	27.9		9.2		4.19667	18.3368
	D05	18.65		H05	28.06		9.36		4.03667	16.4119
	D06	18.7		H06	27.95		9.25		4.14667	17.7122
		18.7							13.3967	17.487
	D07	19.65		H07	28.89		9.25333		4.14334	17.6713
	D08	19.7		H08	28.79		9.15333		4.24334	18.9397
	D09	19.56		H09	28.98		9.34333		4.05334	16.6026
		19.6367							13.3967	17.7379
E120-skin	A10	20.27		E10	29.81		9.59333		3.80334	13.9611
	A11	20.23		E11	30.17		9.95333		3.44334	10.878
	A12	20.15		E12	30		9.78333		3.61334	12.2384
		20.2167							13.3967	12.3592
	B10	18.8		F10	28.58		9.75333		3.64334	12.4955
	B11	18.86		F11	28.56		9.73333		3.66334	12.67
	B12	18.82		F12	28.41		9.58333		3.81334	14.0582
		18.8267								13.0746
