# Supplementary material for: CRISPR/Cas9-mediatedVDRknockout plays an essential role in the growth of dermal papilla cells through enhanced relative genes
Source: PeerJ journal article supplement (doi:10.7717/peerj.7230), 2019-07-03

A

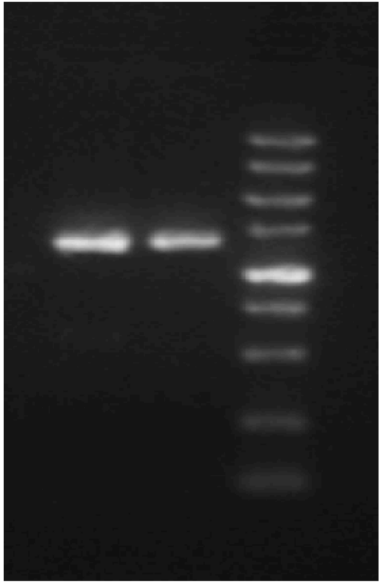

B

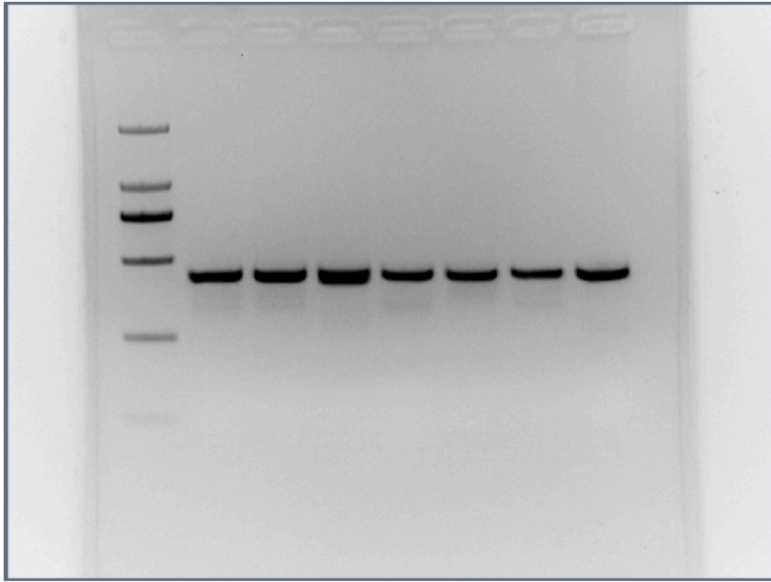

C

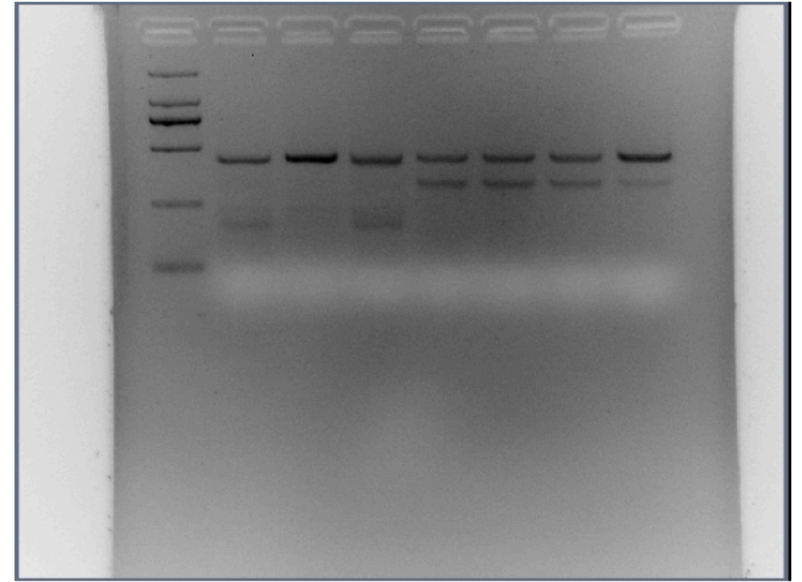

D

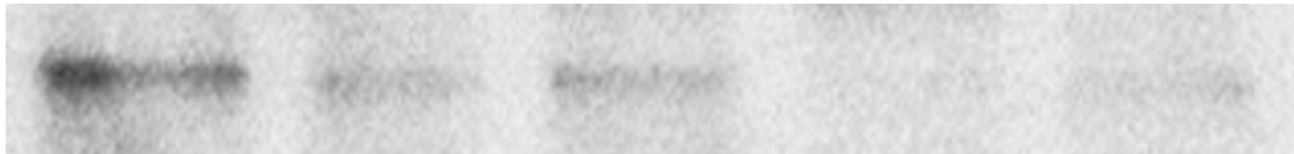

E

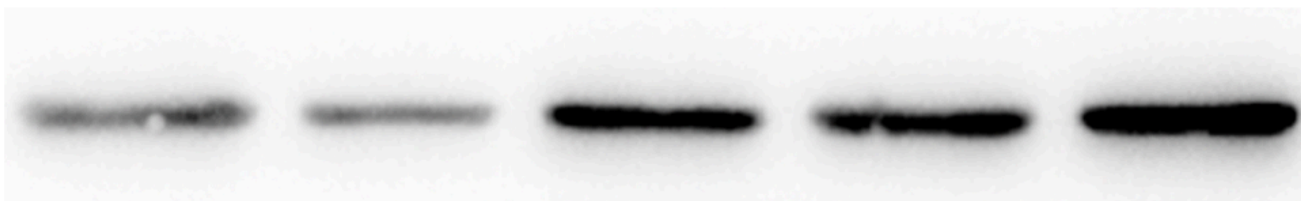

Supplement: Figure.pdf [file Figure.pdf]
