# Supplementary material for: CRISPR/Cas9-mediated VDR knockout plays an essential role in the growth of dermal papilla cells through enhanced relative genes
Source: PeerJ. 2019 Jul 3;7:e7230. doi: 10.7717/peerj.7230 (PMC6612256; doi:10.7717/peerj.7230)
Supplement: Supplemental Information 2 — Each data indicates the cell numbers of VDR −∕− cells and negative control (wild type) from day-1 to day-8 to show the cell growth curve. All the experiments were carried out in triplicate. [file peerj-07-7230-s002.xlsx]

## Sheet: Sheet1
	WT			VDR-/-
D-1	5	5	5	5	5	5
D-2	9	11	10	10	7	9
D-3	21	27	19	17	18	16
D-4	50	55	55	36	35	33
D-5	105	100	103	70	75	79
D-6	140	145	125	95	94	89
D-7	145	120	137	102	99	104
D-8	145	115	140	110	120	125
